# Supplementary material for: Accumulation of formaldehyde causes motor deficits in an in vivo model of hindlimb unloading
Source: PubMed Central journal article supplement (PMC8376875; doi:10.1038/s42003-021-02448-9), 2021-08-19
Supplement: 42003_2021_2448_MOESM1_ESM.pdf [file 42003_2021_2448_MOESM1_ESM.pdf]

## Supplementary Figure 1

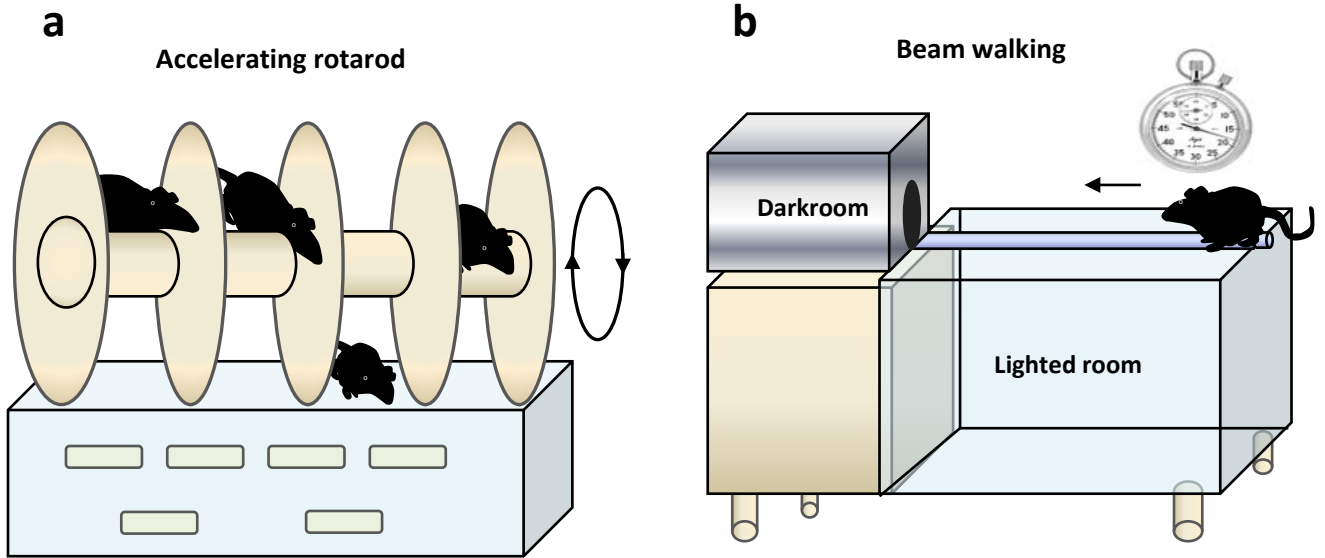

**Fig. S1. Motor behaviors assessed by the accelerated rotarod test (a) and beam walking test (b).**

## Supplementary Figure 2

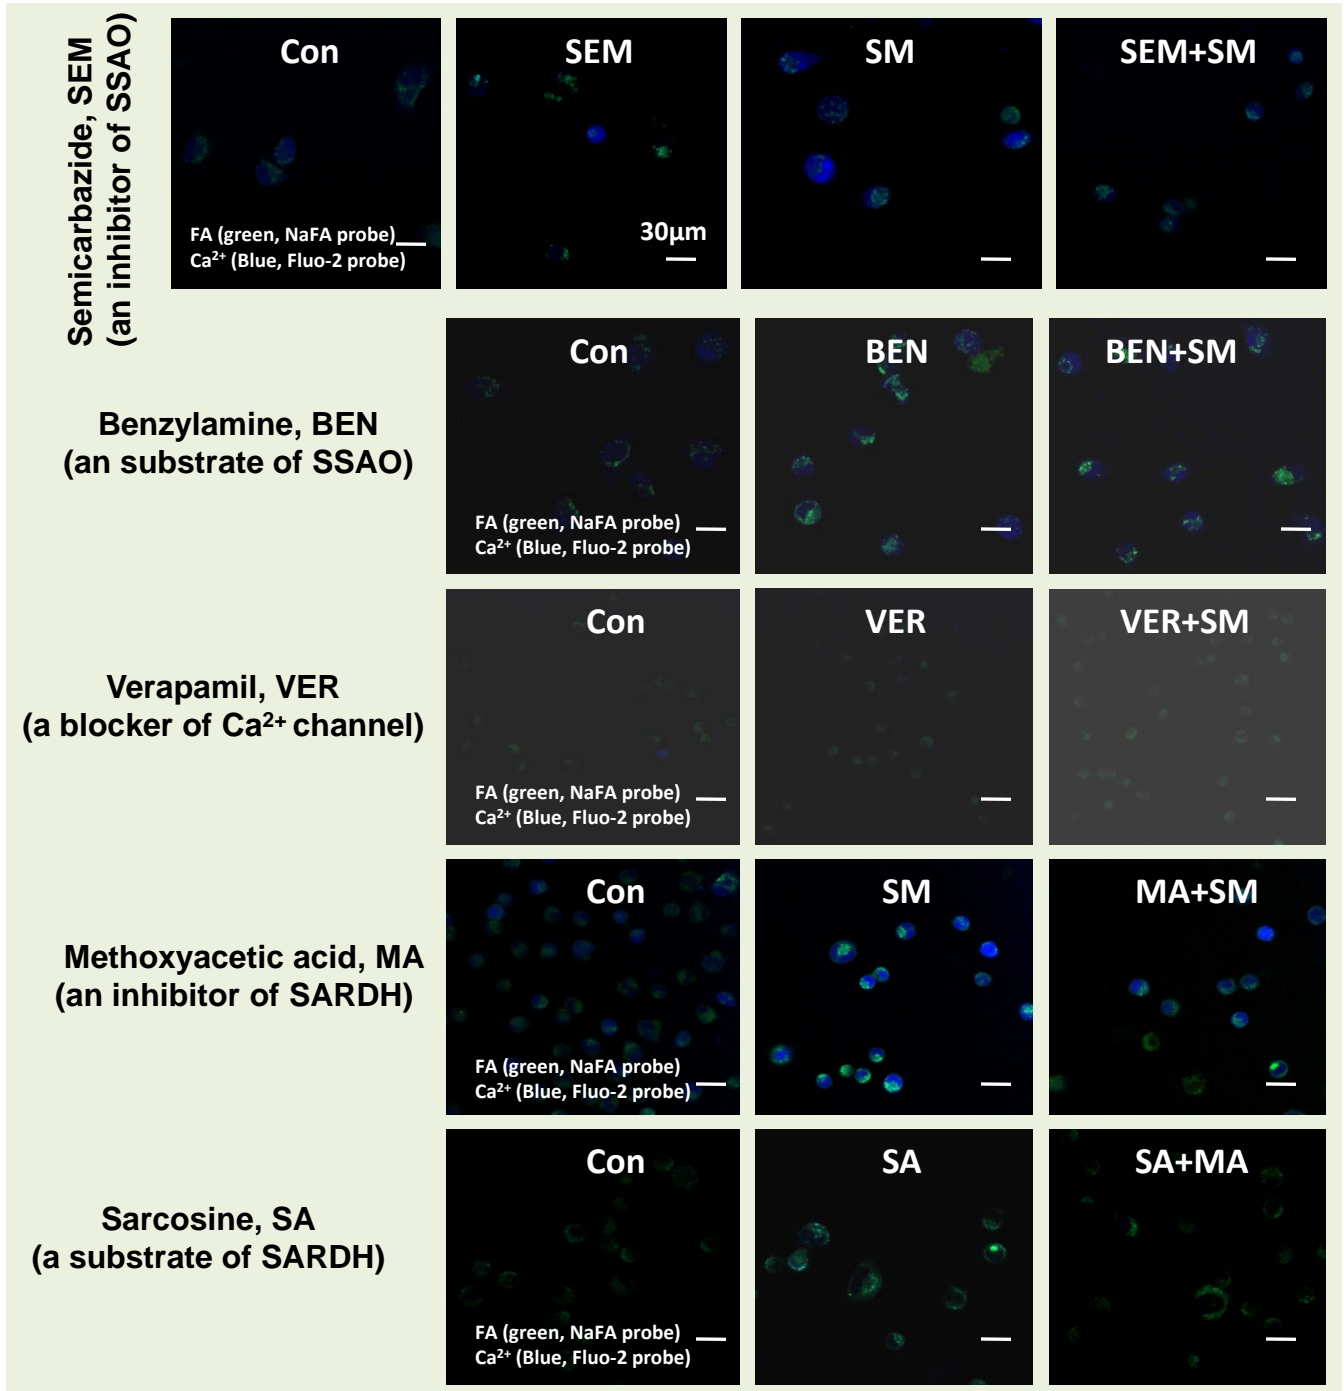

**Fig. S2.** The effects of the medicines on  $[\text{Ca}^{2+}]$  influx and intracellular FA generation in the cultured HAECs. BEN: Benzylamine; HAECs: Human aortic endothelial cells; MA: Methoxyacetic acid; SA: Sarcosine; SEM: Semicarbazide; SM: simulated microgravity; VER: Verapamil. Scale bar = 30  $\mu\text{m}$ .

## Supplementary Figure 3

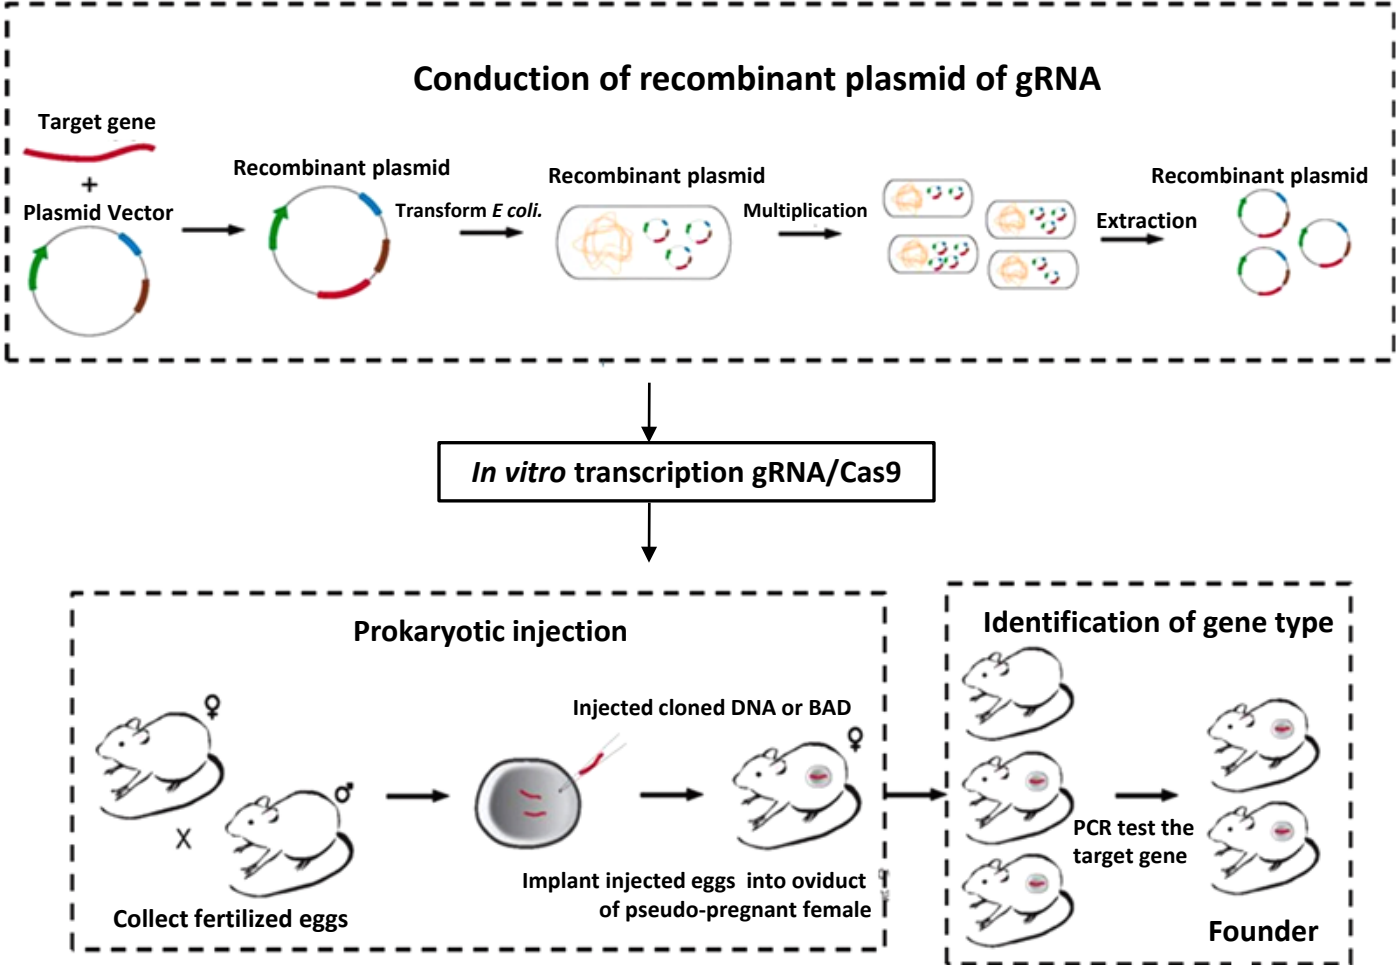

**Fig. S3. The technology roadmap of making *FDH*<sup>-/-</sup> mice by using CRISPR/Cas9 method.**

## Supplementary Figure 4

### Targeting site selection

Four gRNA targets were designed, including two located upstream of Exon 5 (E5, 220 bp) and two downstream of Exon 6 (E6, 261 bp), to knockout *FDH* gene by simultaneous deleting E5 and E6.

The primer sequences were used to construct gRNA as following:

**A:**

GG GCTCTGATGTGCTTTCTG GGG

M-Aldh3(5)-E5A-gR-top: TAGGGCTCTGATGTGCTTTCTG

M-Aldh3(5)-E5A -gR-dow: AAACCAGAAAGCACATCAGAGC

**B:**

GG TCCCTGTGCTACTGTGTT AGG

M-Aldh3(5)-E5B-gR-top: TAGGTCCCTGTGCTACTGTGTT

M-Aldh3(5)-E5B-gR-dow: AAACAACACAGTAGCACAGGGA

**C:**

GG TTCTGAAACAGCTTTGGT AGG

M-Aldh3(5)-E5C-gR-top: TAGGTTCTGAAACAGCTTTGGT

M-Aldh3(5)-E5C-gR-dow: AAACACCAAAGCTGTTTCAGAA

**D:**

GG GGAATTACAGAAGGGCTC AGG

M-Aldh3(5)-E5D-gR-top: TAGGGGAATTACAGAAGGGCTC

M-Aldh3(5)-E5D-gR-dow: AAACGAGCCCTTCTGTAATTCC

**Fig. S4. The primer sequences to construct gRNA plasmid.**

## Supplementary Figure 5

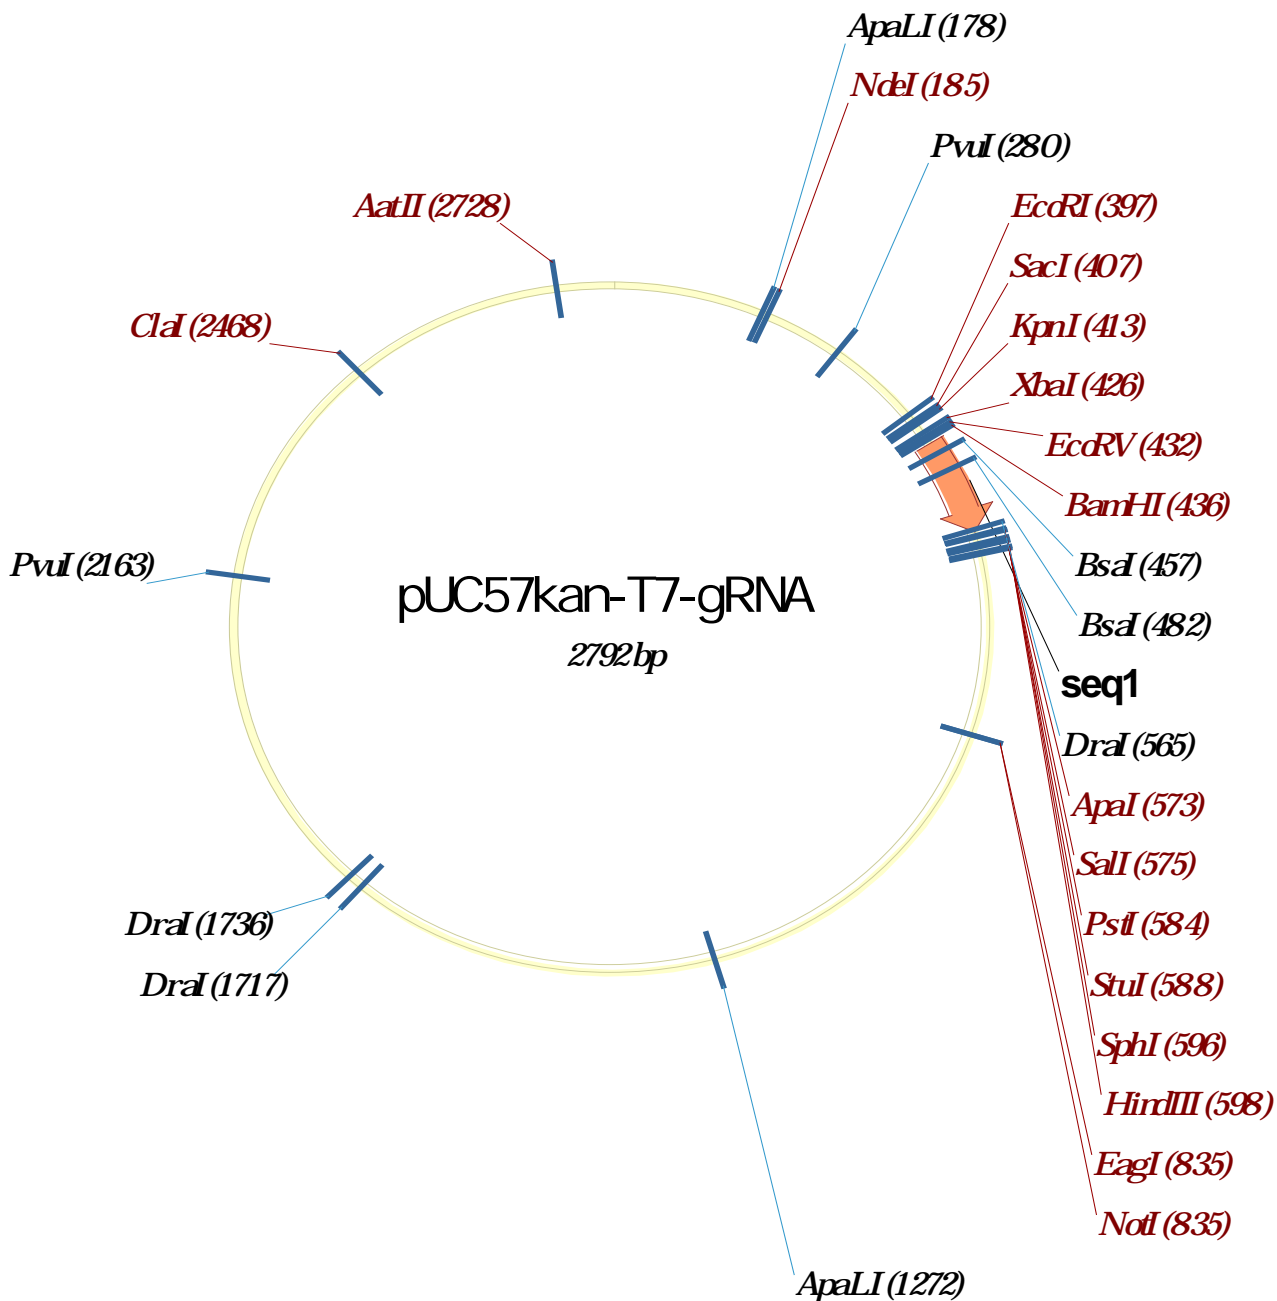

**Fig. S5. Construction of plasmid- pUC57kan-T7-gRNA.**

## Supplementary Figure 6

pUC57-T7-gRNA

TAATAC GACTCACTAT **T** **AGG**TGAGACC GAGAGAG **GGT CTC** GTTTA GAGCTAGAAA TAGCAAGTTA AAATAAGGCT ...GAGTCGGTGC TTTTTTAA  
ATTATG CTGAGTGATA TCC **ACTCTGG** CTCTCT **CCA GAGTCAAA** AT CTCGATCTTT ATCGTTCAAT TTTATTCCGA ...CTCAGCCACG AAAAAAATTT

+1

Bsal

Bsal

Dral

TAGNNNNNNNNNNNNNNNNNNNN  
NNNNNNNNNNNNNNNNNNNCAAA

Motif: 5'-GG-18N-NGG-3'  
or: 5'-GG-20N-NGG-3'

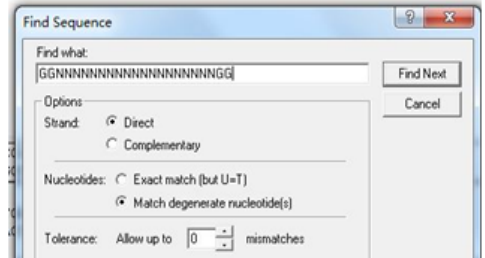

**Fig. S6. Mapping of insertion sites into plasmid- pUC57kan-T7-gRNA.**

# Supplementary Figure 7

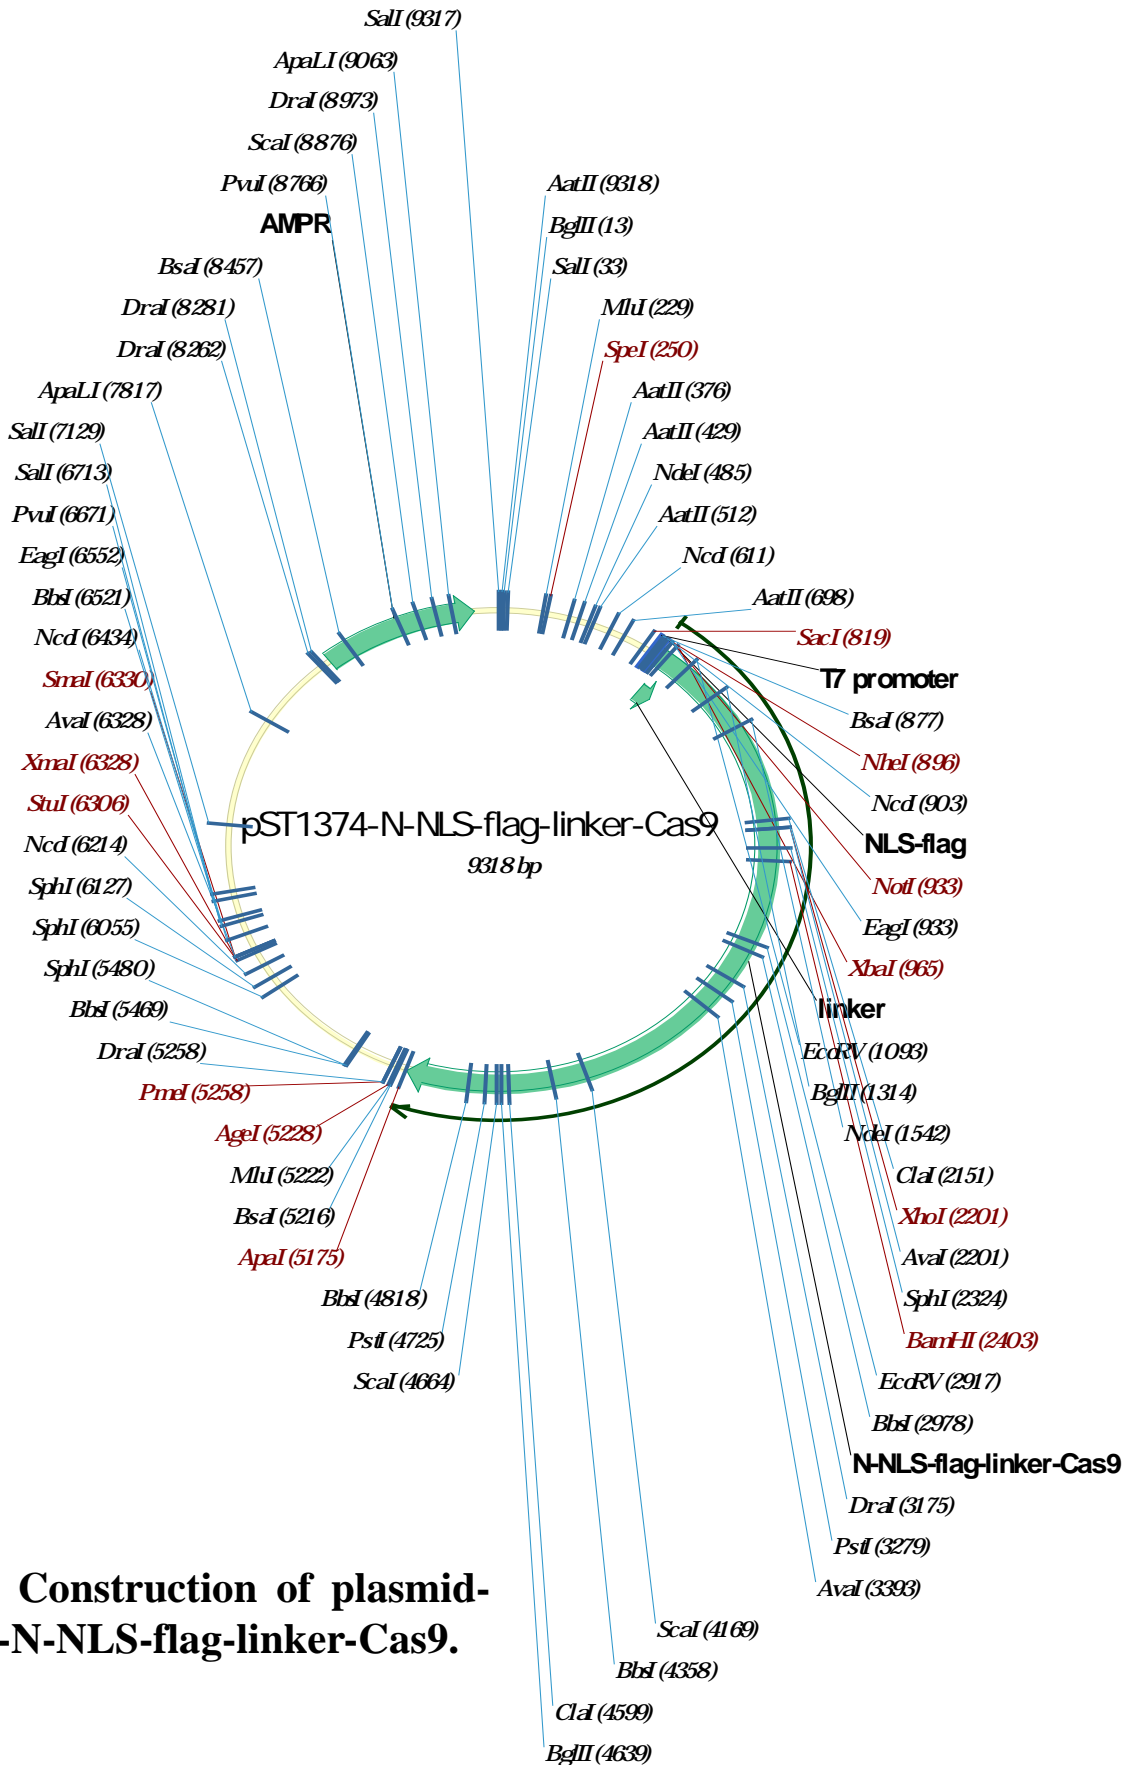

**Fig. S7. Construction of plasmid-Pst1374-N-NLS-flag-linker-Cas9.**

## Supplementary Figure 8

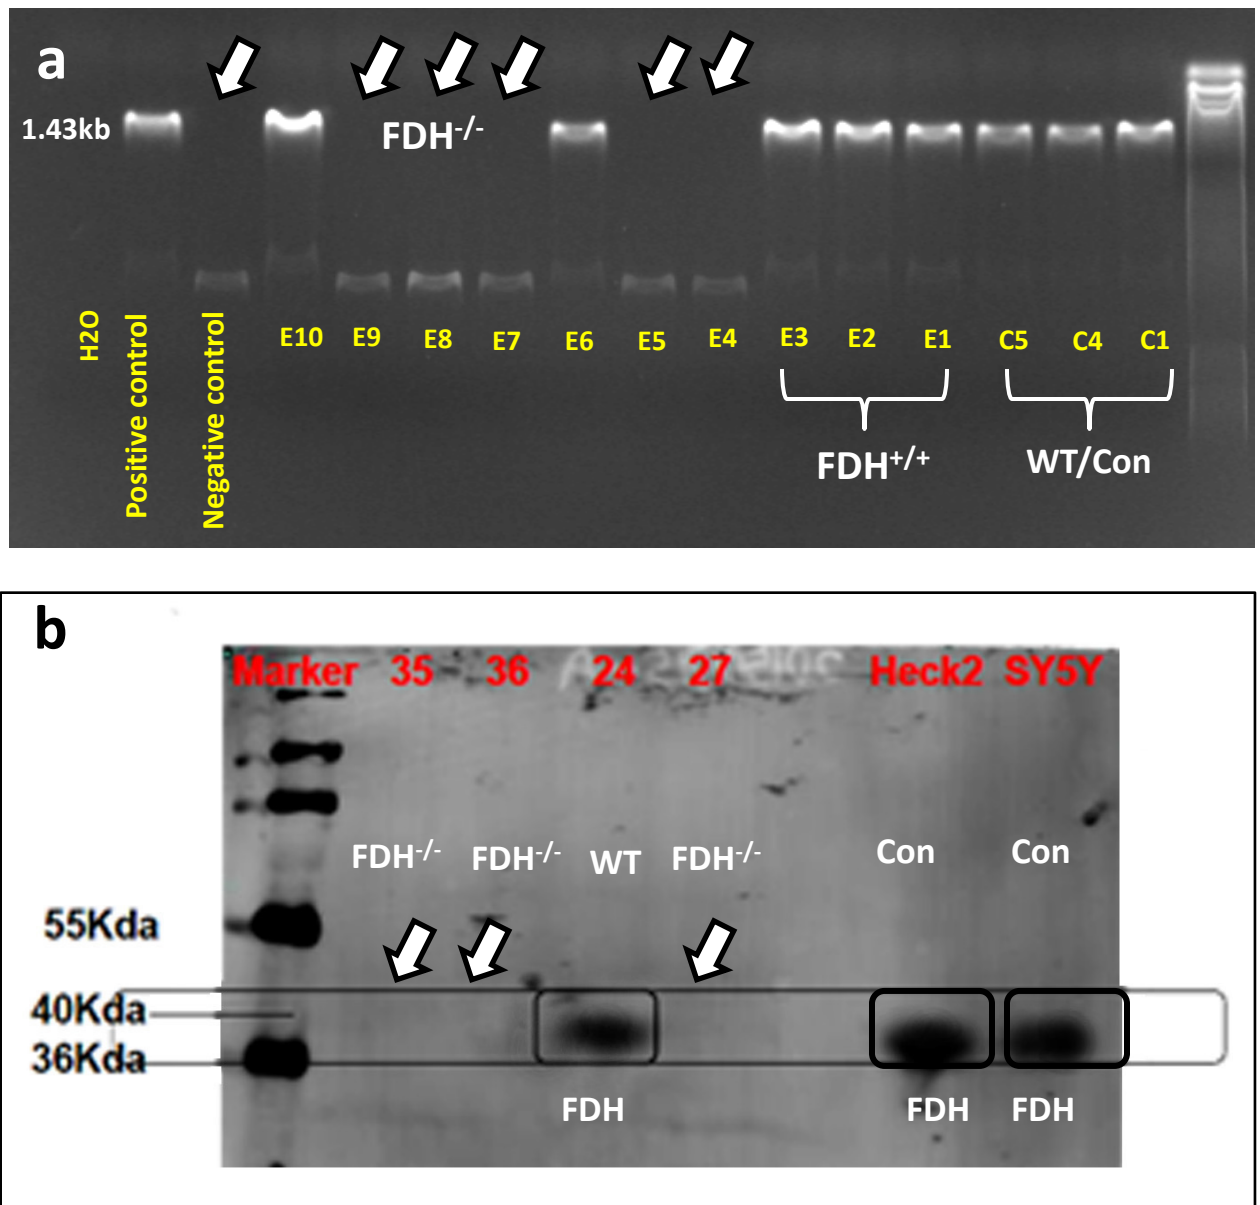

**Fig. S8.** The DNA with 1.43 kb and protein with 40 Kda of FDH in these *FDH*<sup>-/-</sup> mice were identified by the methods of reverse transcription- polymerase chain reaction (RT-PCR) (A) and Western blotting (B) (The proteins extracted from 24<sup>#</sup> wild-type mice, cultured Heck2 and SH-SY5Y cells acted as positive controls).



## Supplementary Figure 9

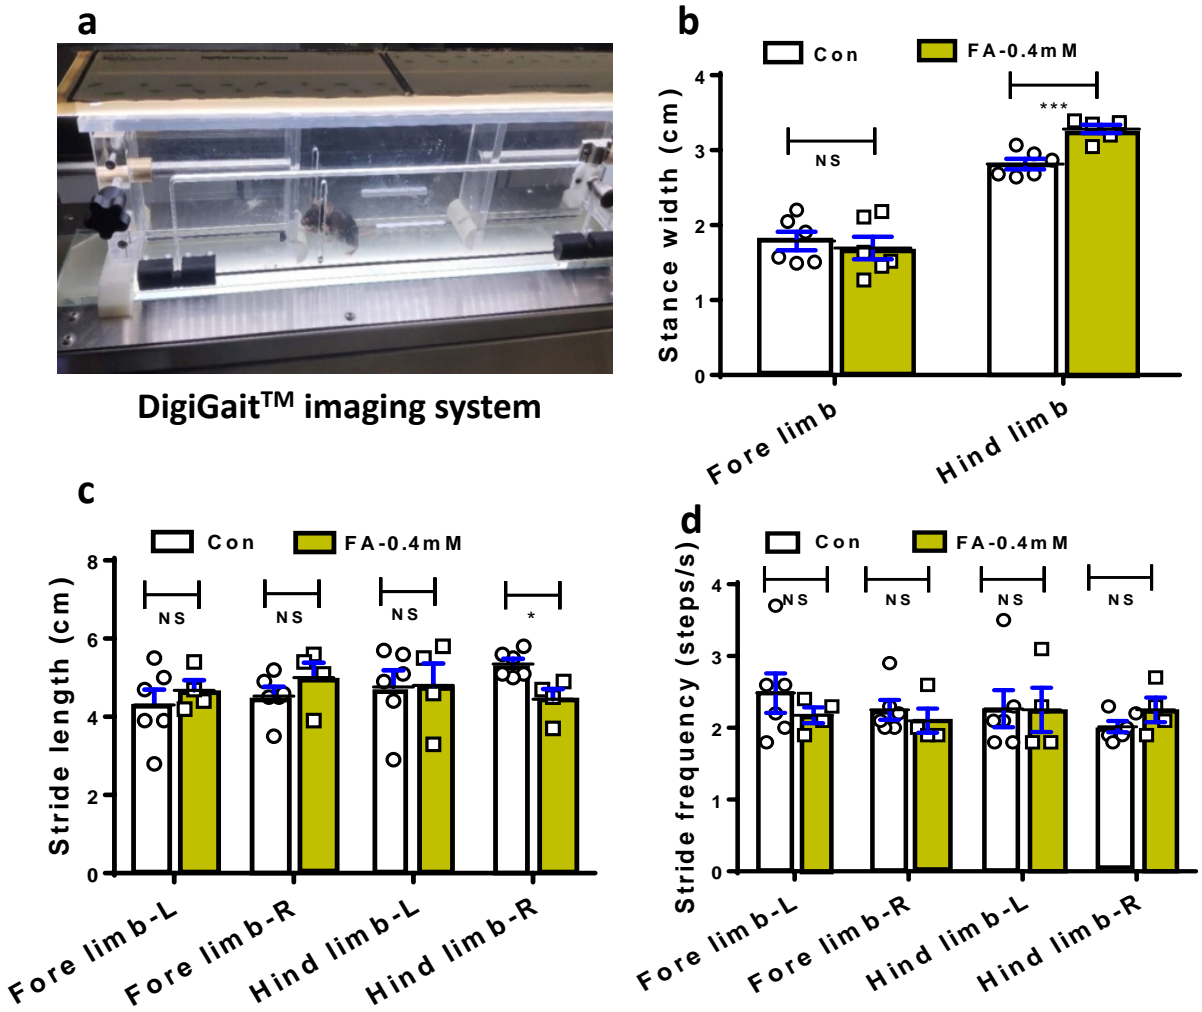

**Fig. S9. Gait analysis of control and model mice intramuscularly injected with formaldehyde for 14 consecutive days.** (a) Gait analysis by the DigiGait™ imaging system. (b) Statistical analysis of stance width (n=6). Con: wild-type mice injected with PBS; FA-0.4mM: the healthy adult mice intramuscularly injected with 0.4 mM formaldehyde. (c) Statistical analysis of stride length (n=6). (d) Statistical analysis of stride frequency (n=6). Error bars show mean  $\pm$  SEM; NS: no statistical significance; \* $p < 0.05$ ; \*\*\* $p < 0.001$ .

## Supplementary Figure 10

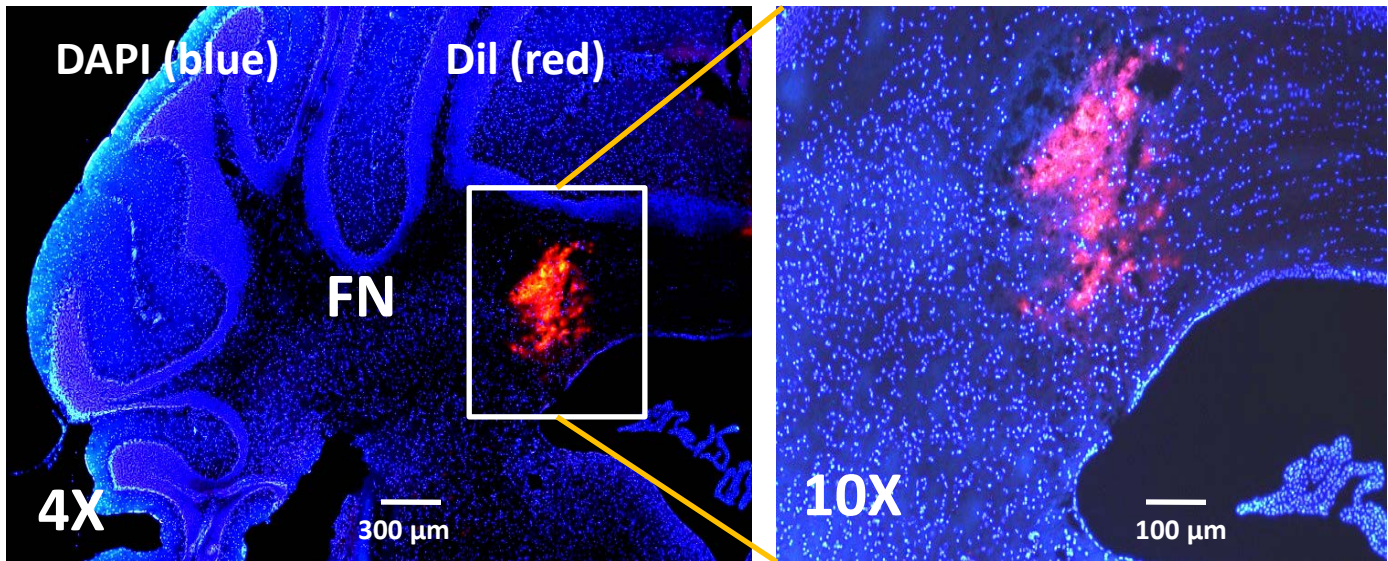

**Fig. S10.** The injection site of the fastigial nucleus was identified by using red fluorescent probe-Dil to mark cell membrane and blue DAPI to stain nucleus. FN: fastigial nucleus. Scale bar = 300 μm.



## Supplementary Figure 11

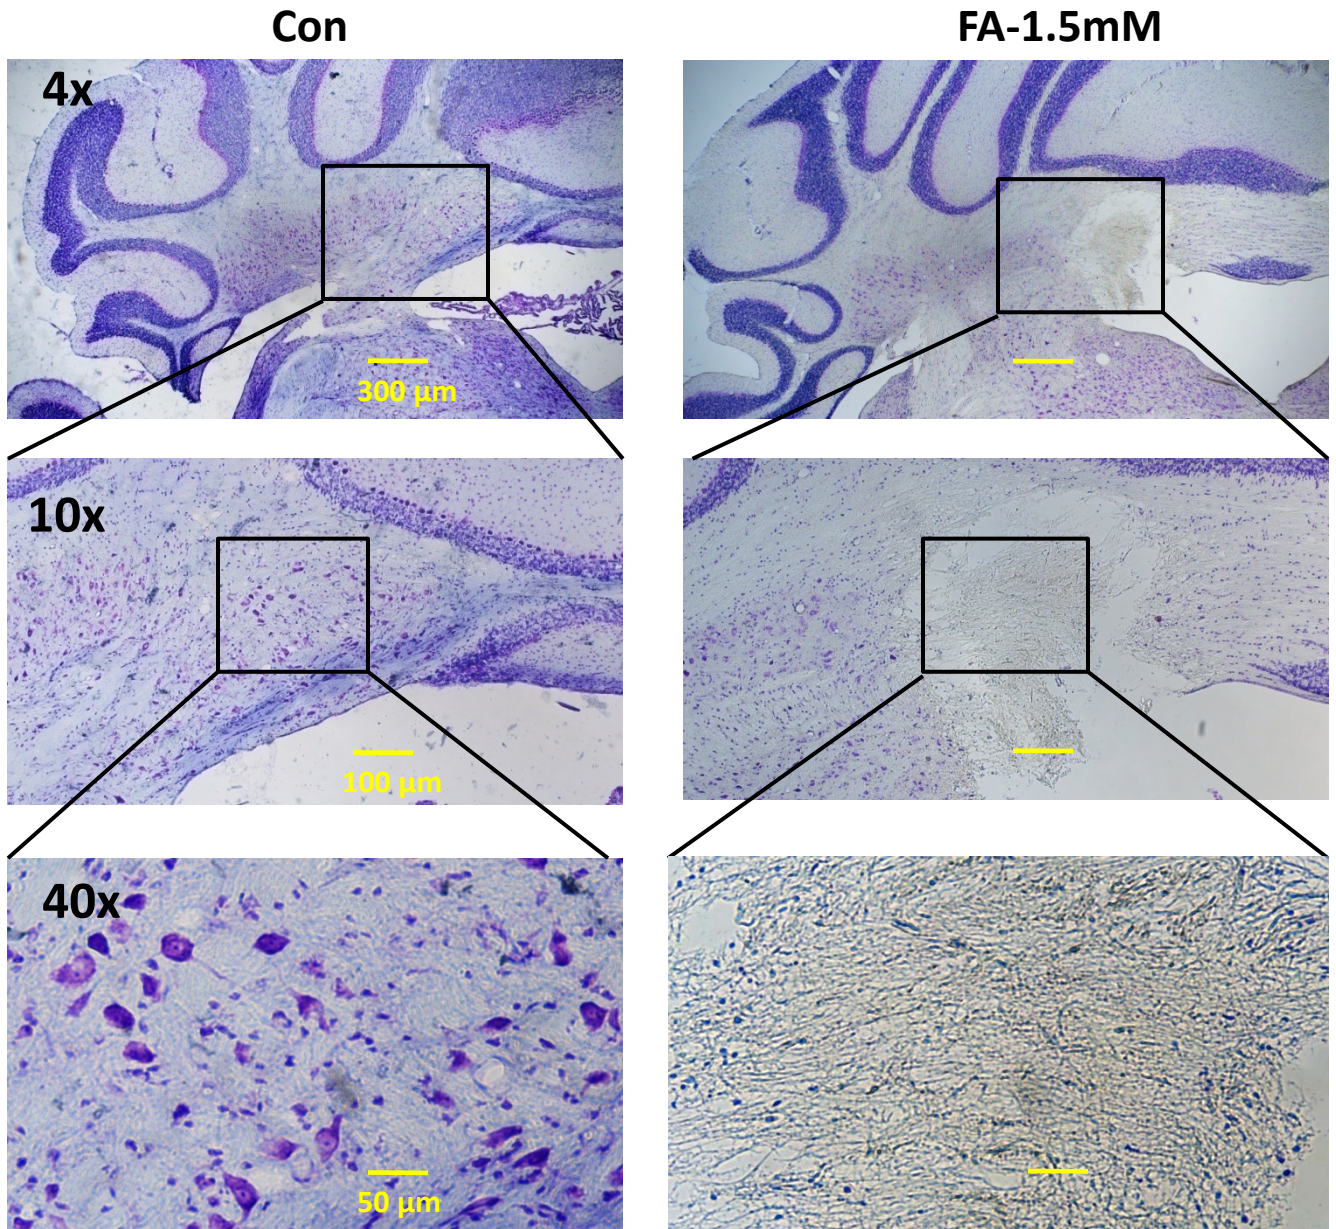

**Fig. S11. Injection of formaldehyde at 1.5 mM into fastigial nucleus induced the death of cerebellar neurons stained by using Nissl staining solutions.**



## Supplementary Figure 12

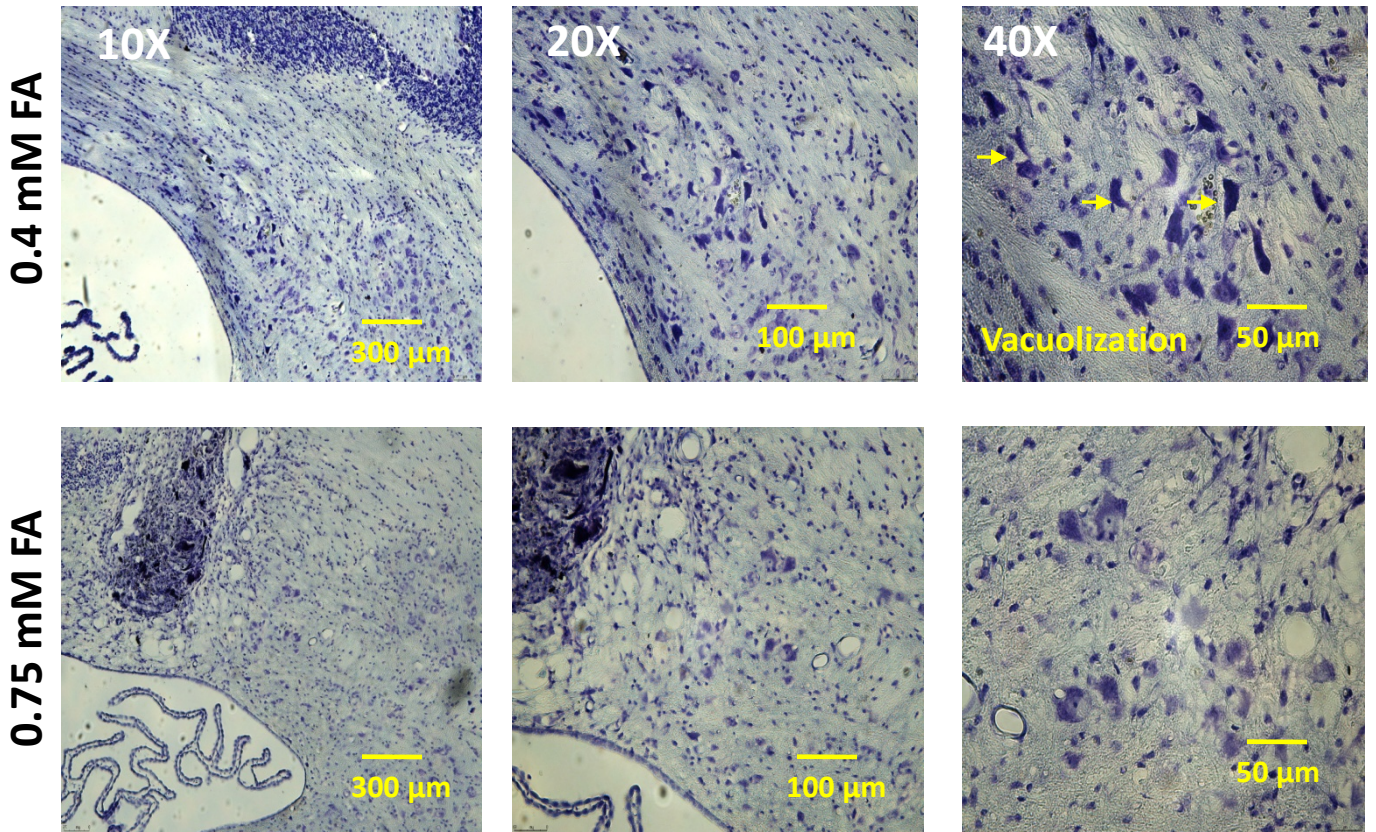

**Fig. S12.** Injection of formaldehyde at 0.4 and 0.75 mM into fastigial nucleus induced the death of cerebellar neurons stained by using Nissl staining solutions, respectively.

## Supplementary Figure 13

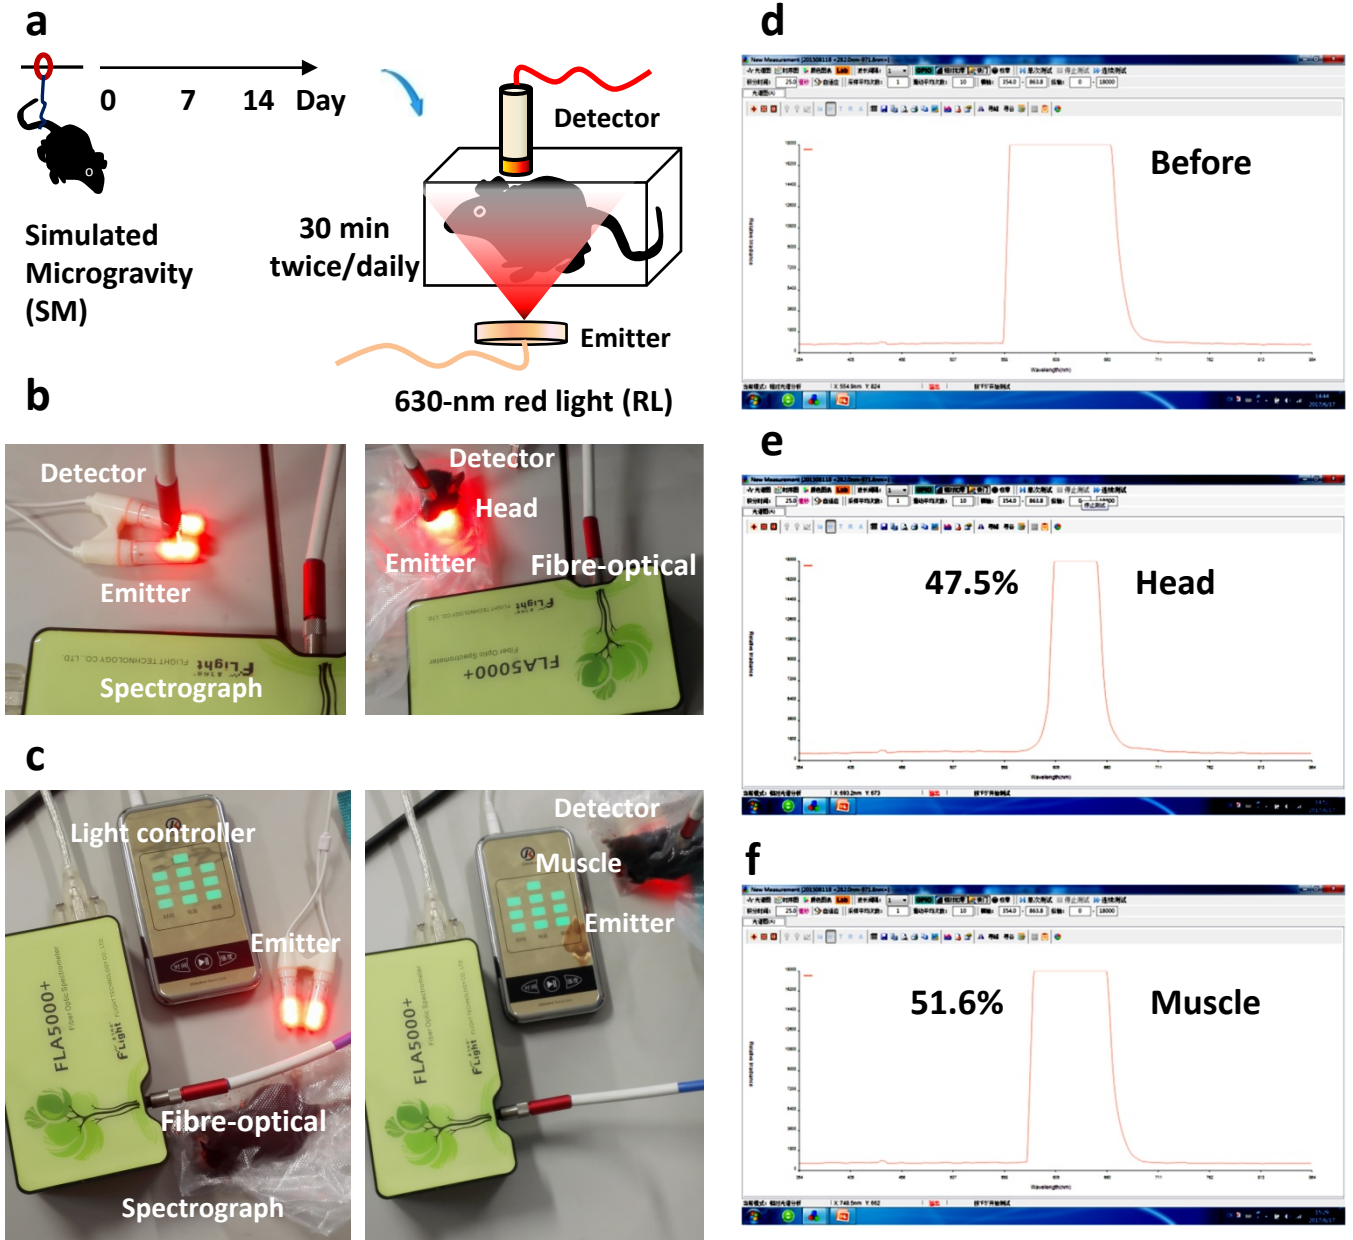

**Fig. S13. The penetrate ratio of red light at 630 nm detected by spectrograph. (a)** The free-moving SM mice illuminated in a box. **(b and c)** Detected the penetration ratio by spectrograph. **(d)** The light intensity of light emitter before penetrated into organism of mice. **(e and f)** Red light penetrated into the head and muscle with 47.5% and 51.6% penetration ratio, respectively.

## Supplementary Figure 14

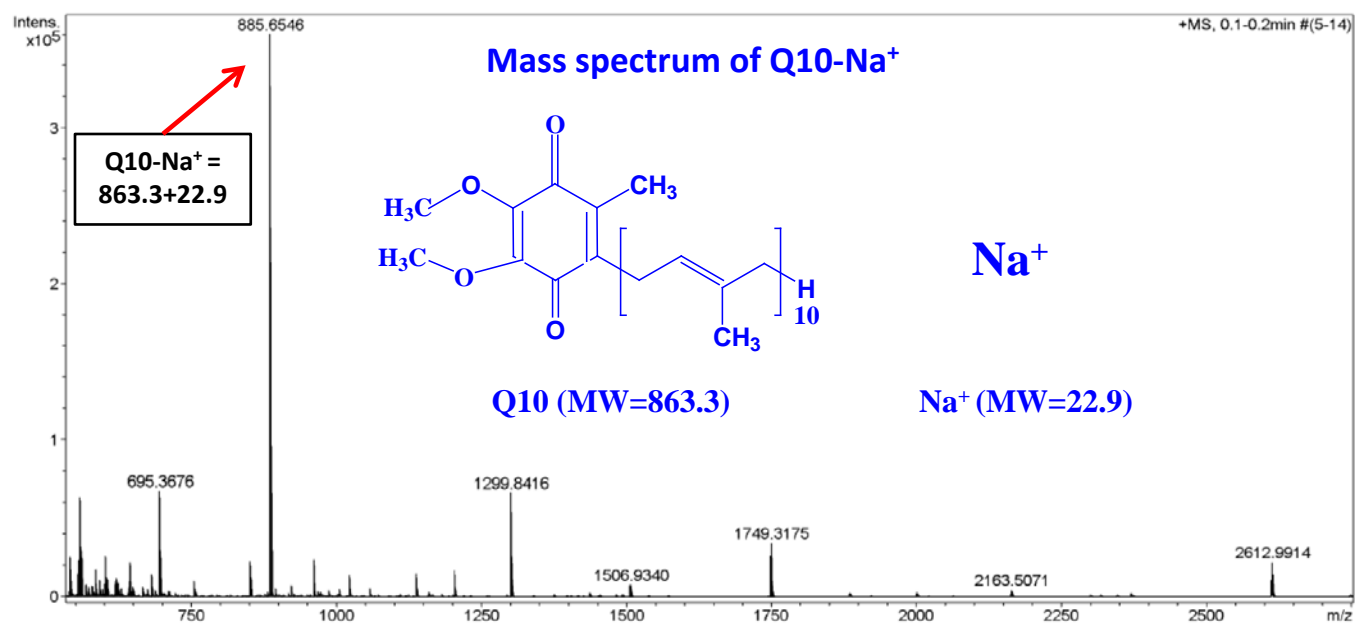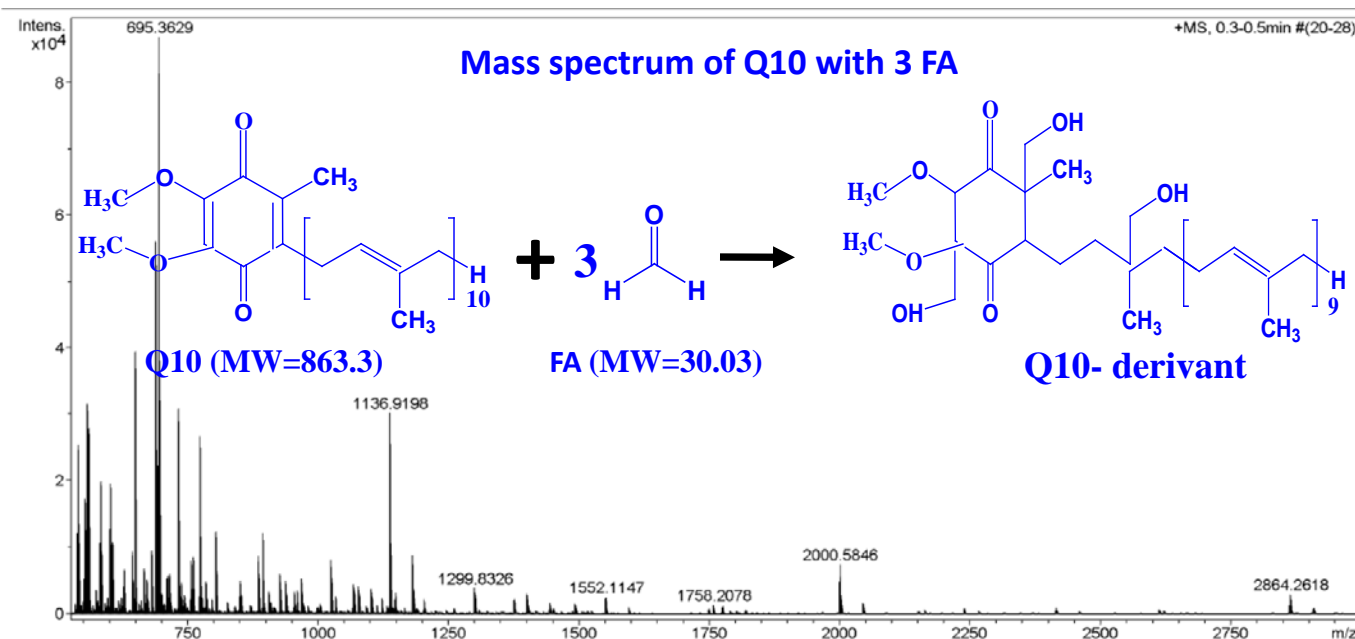

**Fig S14.** Q10 (100  $\mu\text{M}$ ) and FA (400  $\mu\text{M}$ ) were co-incubated in 100% alcohol solutions for 72 hours at 37  $^{\circ}\text{C}$ , and the mixed solutions were examined by gas chromatography- tandem with mass spectrometry (GC-MS/MS) (#MicroTOF-Q, Bruker, Germany)



## Supplementary Figure 15

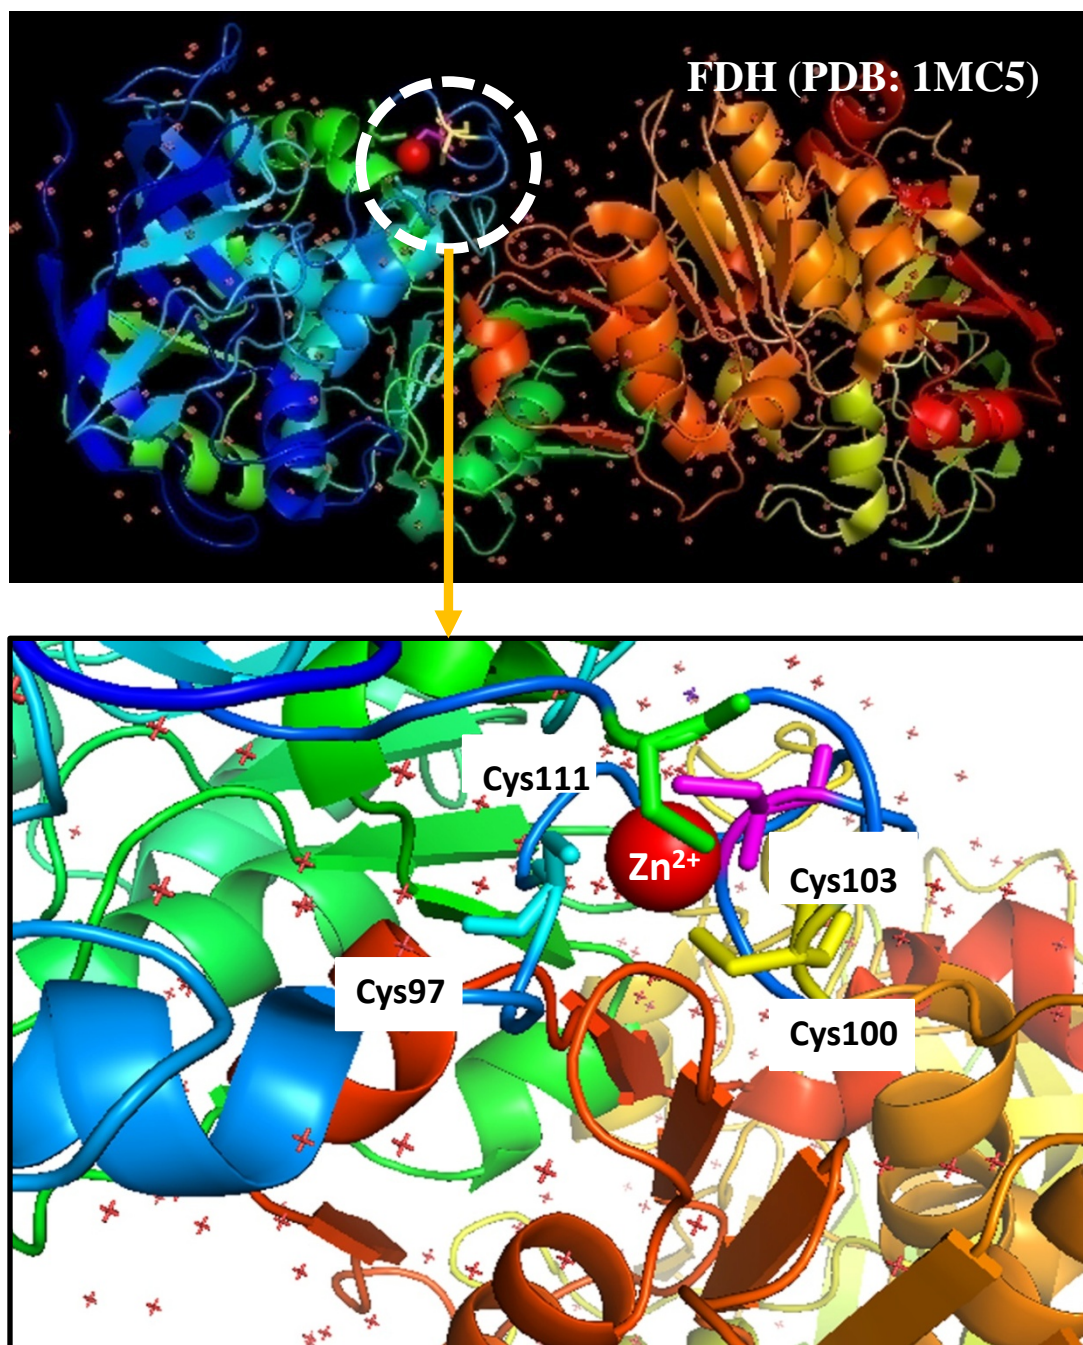

**Fig. S15.** The Cys 97 and 100 residues of FDH (PDB: 1MC5) were activated by 630-nm red light, which was analyzed by PyMOL software. Cys: cysteine. Cys111 (green); Cys103 (purple); Cys97 (dusty blue); Cys100 (yellow).

## Supplementary Figure 16

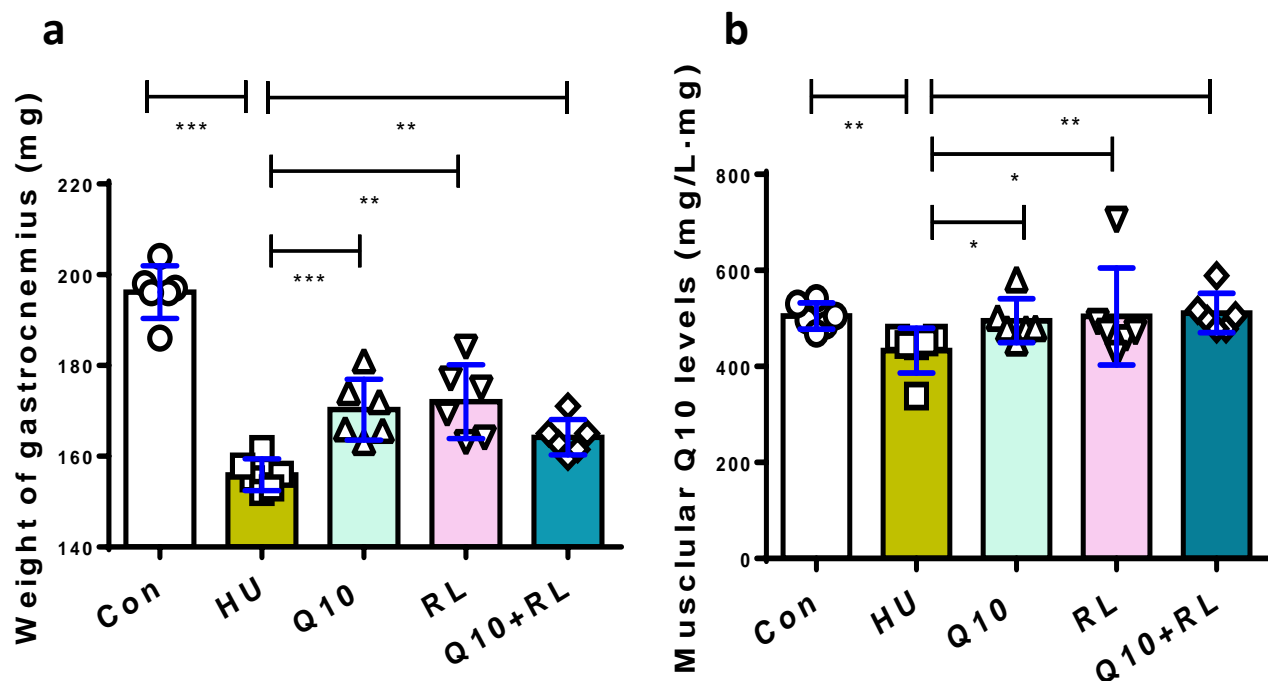

**Fig. S16. Scavenging formaldehyde restored the weights of gastrocnemius and Q10 levels in HU mice.** (a) The weight of gastrocnemius of these five groups' mice (n=6). HU: hindlimb unloading; Q10: HU mice intragastrically administered (i.g.) 30-nm coenzyme Q10; RL: HU mice illuminated with 630-nm red light. (b) Muscular Q10 levels detected by Q10 kits (n=6). Error bars show mean  $\pm$  S.E.M; \*p<0.05; \*\*p<0.01; \*\*\*p<0.001.



## Supplementary Figure 17

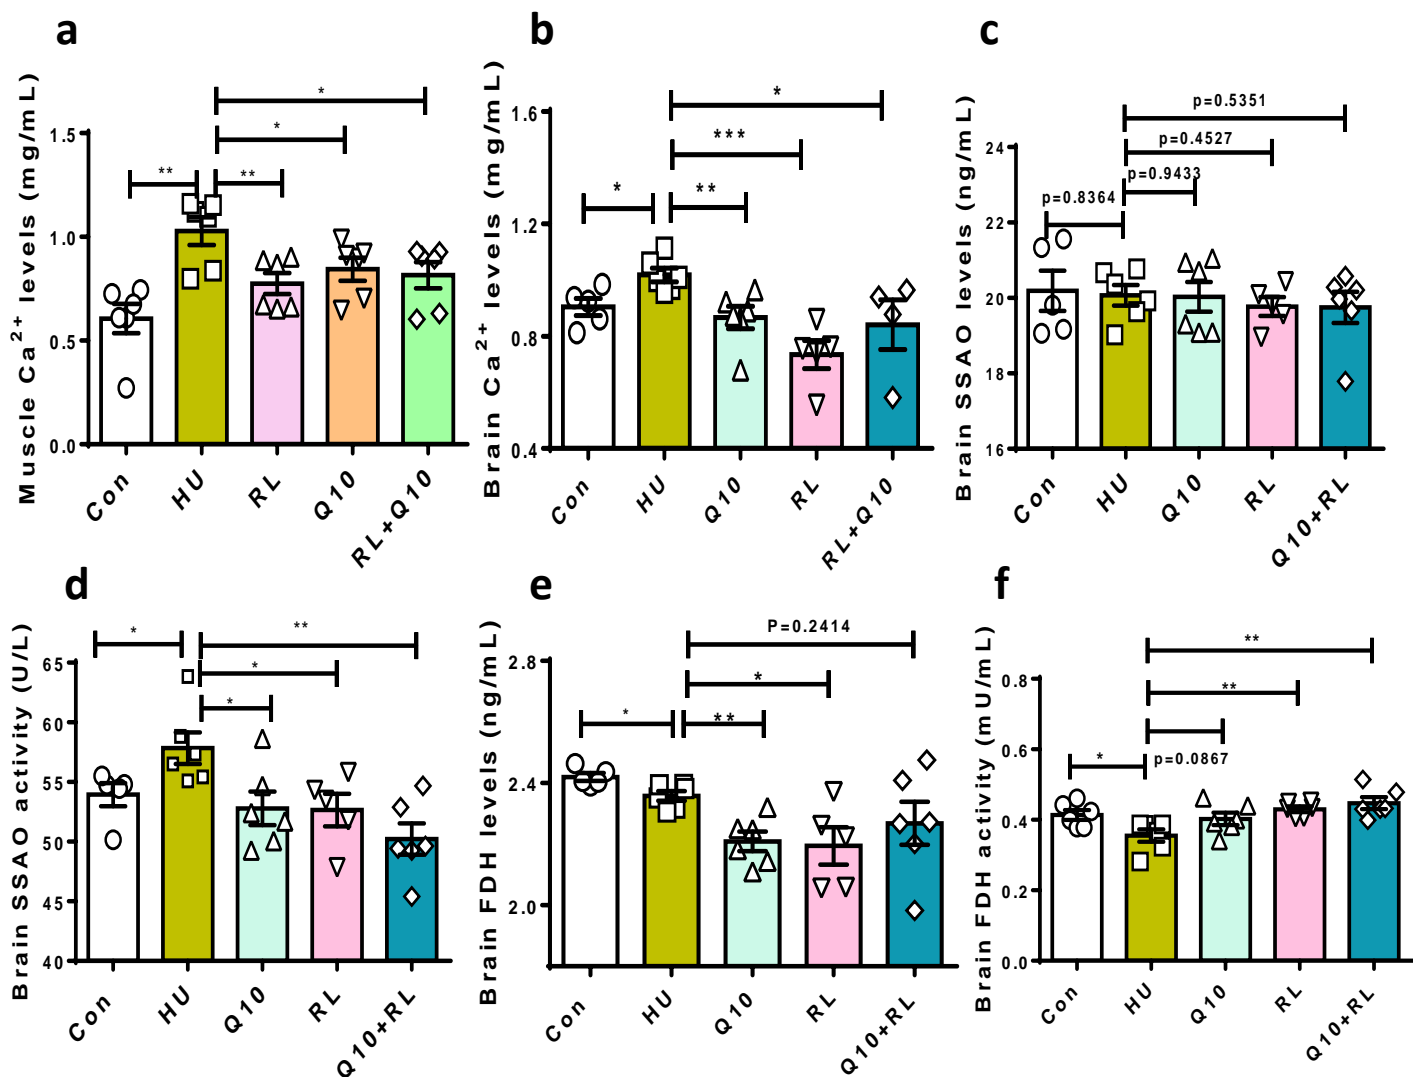

**Fig. S17. The effects of the different treatments on the intracellular  $\text{Ca}^{2+}$ , SSAO and FDH in the muscles and brains of HU mice. (a, b) Changes in the  $\text{Ca}^{2+}$  contents in the muscles and brains. HU: hindlimb unloading. (c, d) Changes in the levels and activities of SSAO in the brains. (e, f) Changes in the levels and activities of FDH in the brains. Q10: HU mice intragastrically administered (i.g.) 30-nm coenzyme Q10; RL: HU mice illuminated with 630-nm red light. (n=6). Error bars show mean  $\pm$  S.E.M; \* $p < 0.05$ ; \*\* $p < 0.01$ ; \*\*\* $p < 0.001$ .**

## Supplementary Figure 18

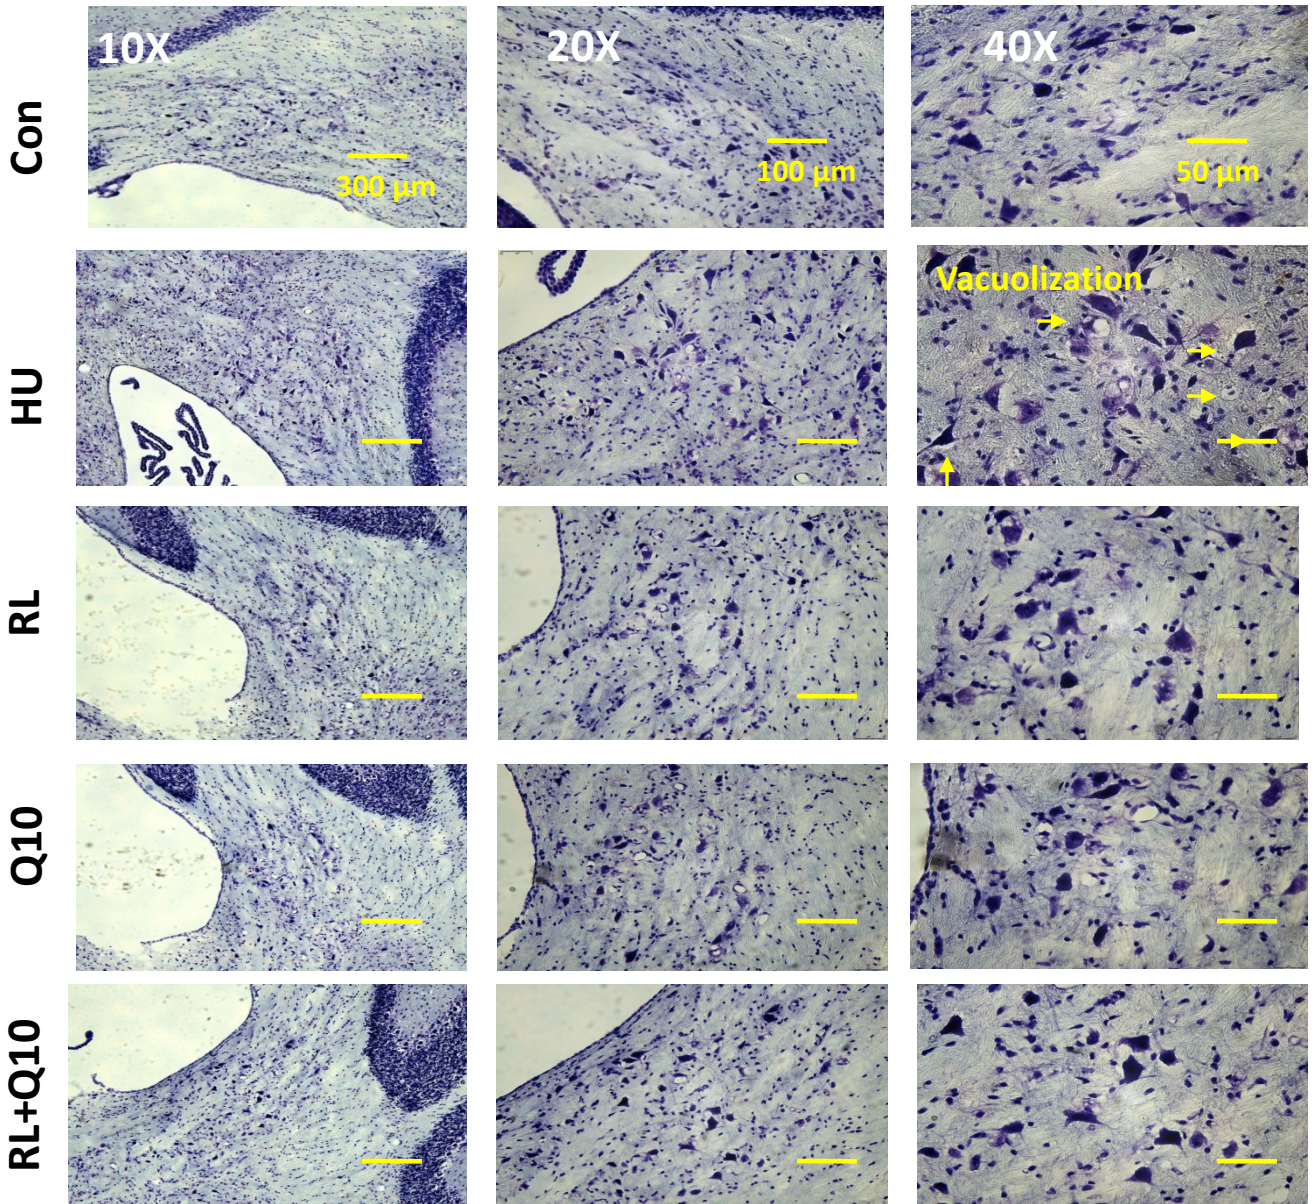

**Fig. S18.** The effects of the different treatments on the death of cerebellar neurons stained by using Nissl staining solutions. Con: control; HU: hindlimb unloading; RL: Red light; Q10: Nano-coenzyme Q10.

## Supplementary Figure 19

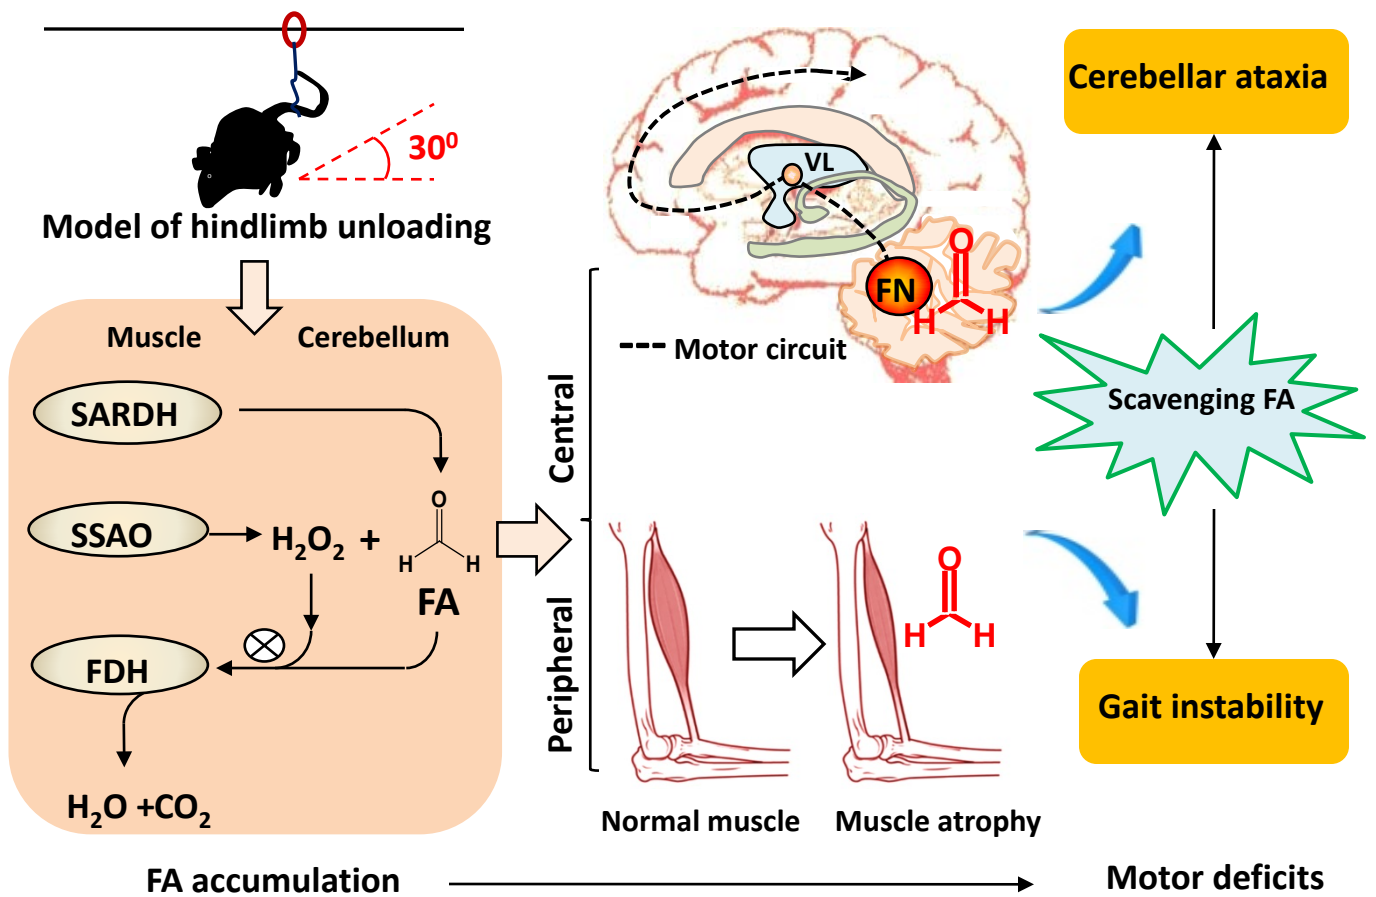

**Fig S19. The model of scavenging HU-derived formaldehyde to rescue motor functions.** FA: formaldehyde ( $\text{HCHO}$ ); FDH: formaldehyde dehydrogenase; FN: fastigial nucleus; HU: hindlimb unloading; SARDH: sarcosine dehydrogenase; SSAO: semicarbazide-sensitive amine oxidase; VL: ventrolateral nucleus of the thalamus;.

## Supplementary Figure 20

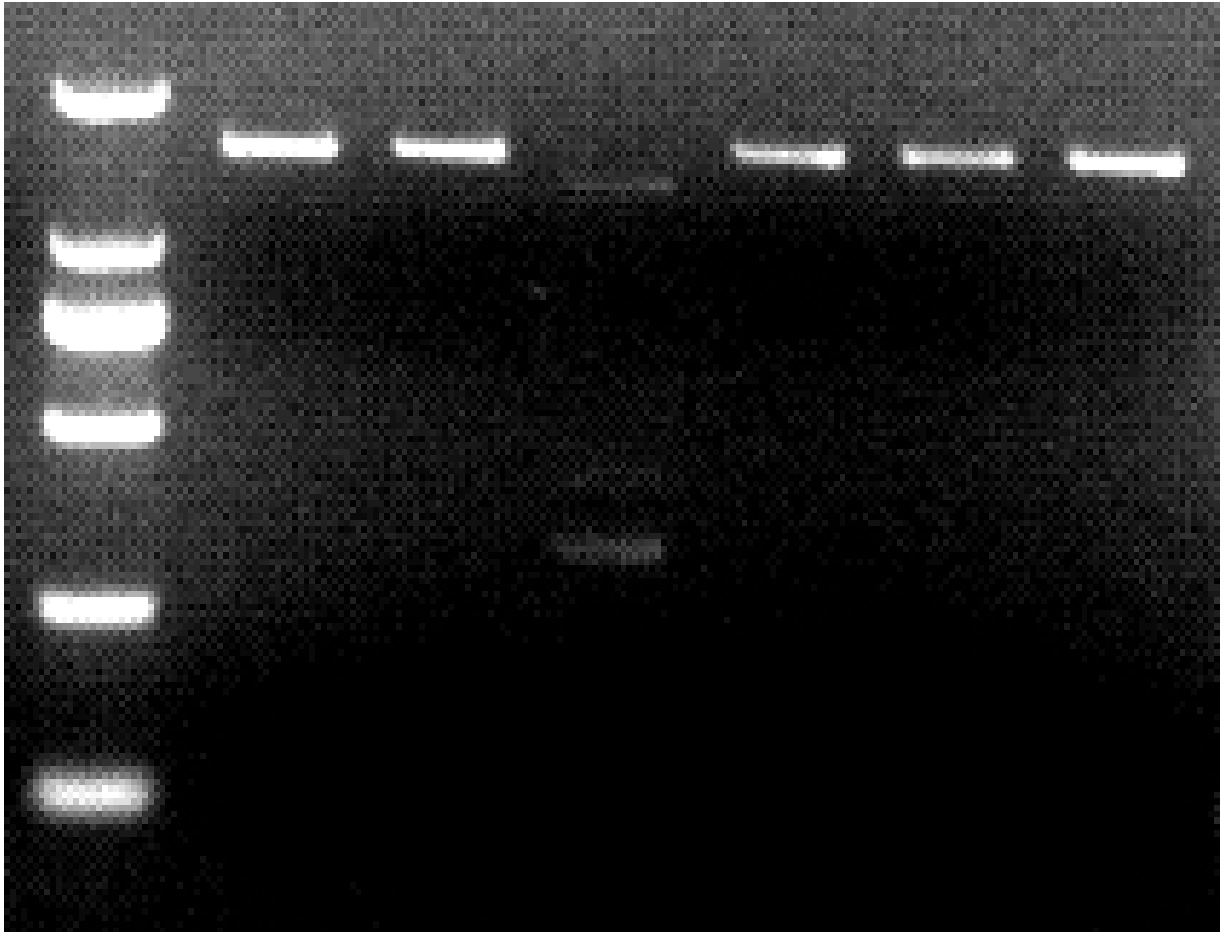

**Fig S20.** Uncropped blot from Figure 4
